# Supplementary material
Source: PubMed Central journal article supplement (PMC2265751)

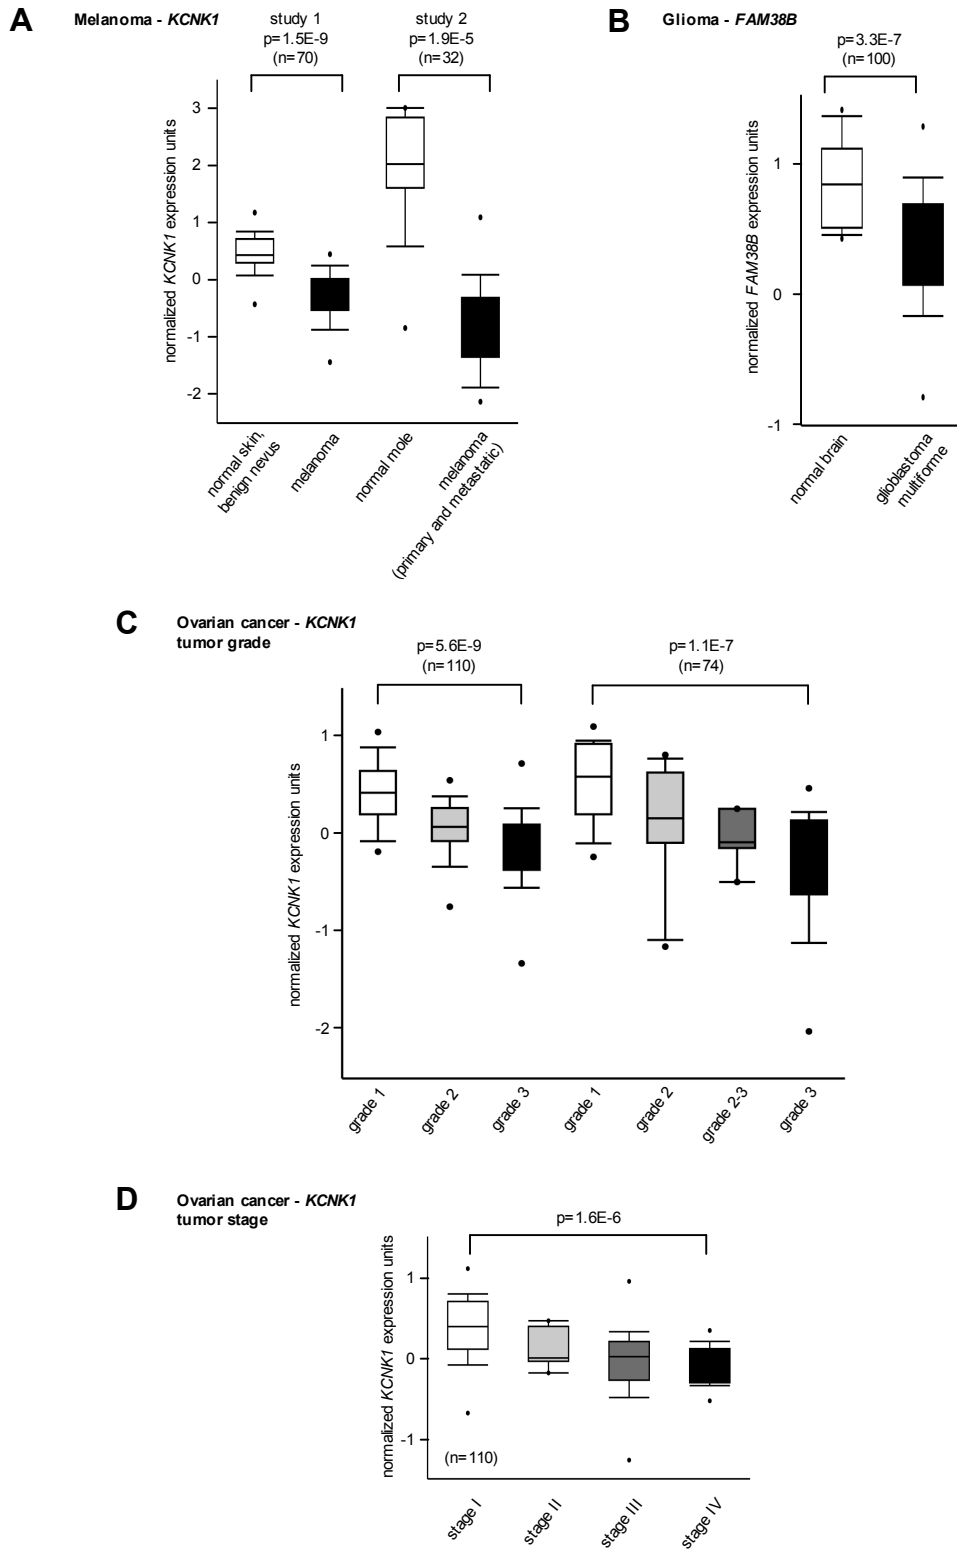

Supplementary Figure-1 (Beitzinger)

Supplement: emboj200813s2.pdf [file emboj200813s2.pdf]
